# Supplementary material
Source: PubMed Central journal article supplement (PMC7769140)
Supplement: NIHMS1648441-supplement-1.pdf [file NIHMS1648441-supplement-1.pdf]

**Appendix**  
**The Dose–Response Relationship Between Physical Activity**  
**and Cardiometabolic Health in Adolescents**  
**Sriram et al.**

**Appendix Table 1.** Distribution of Physical Activity and Cardiometabolic Measures Among Adolescents (Age 12–19 Years),<sup>a</sup> NHANES

| Variable                                   | Median (Q1, Q3)                   |
|--------------------------------------------|-----------------------------------|
| <b>Physical activity</b>                   |                                   |
| Objective physical activity <sup>b</sup>   |                                   |
| Female                                     | 36.9 (18.4, 77.2) minutes/week    |
| Male                                       | 68.0 (31.1, 142) minutes/week     |
| Self-report physical activity <sup>c</sup> |                                   |
| Female                                     | 266.0 (120.0, 526.0) minutes/week |
| Male                                       | 372.0 (179.0, 655.0) minutes/week |
| <b>Cardiometabolic measure</b>             |                                   |
| <b>Median (Q1, Q3)</b>                     |                                   |
| Systolic blood pressure                    |                                   |
| Female                                     | 105.5 (99.6, 111.7) mmHg          |
| Male                                       | 110.8 (104.3, 117.4) mmHg         |
| Diastolic blood pressure                   |                                   |
| Female                                     | 61.4 (54.3, 67.6) mmHg            |
| Male                                       | 59.2 (51.5, 66.7) mmHg            |
| Total cholesterol                          |                                   |
| Female                                     | 157.8 (140.1, 176.9) mg/dL        |
| Male                                       | 150.3 (134.3, 171.2) mg/dL        |
| High density lipoprotein                   |                                   |
| Female                                     | 52.1 (45.0, 61.3) mg/dL           |
| Male                                       | 47.8 (40.6, 55.5) mg/dL           |
| BMI <sup>d</sup>                           |                                   |
| Female                                     | 77.7 (69.0, 92.7) percentile      |
| Male                                       | 80.8 (72.0, 95.3) percentile      |
| VO <sub>2</sub> max <sup>c</sup>           |                                   |
| Female                                     | 36.2 (32.3, 41.4) ml/kg(min)      |
| Male                                       | 44.3 (39.1, 49.9) ml/kg(min)      |

<sup>a</sup>Reported among adolescents with any reported physical activity or cardiometabolic measure.

<sup>b</sup>Data from NHANES 2003–2006.

<sup>c</sup>Data from NHANES 2007–2016.

<sup>d</sup>BMI represented as percent of the 95th percentile.

NHANES, National Health and Nutrition Examination Survey.

**Appendix**  
**The Dose–Response Relationship Between Physical Activity**  
**and Cardiometabolic Health in Adolescents**  
**Sriram et al.**

**Appendix Table 2.** Sample Characteristics of Adolescents (Age 12–19 Years), NHANES 2003–2006

| <b>Characteristics</b>                          | <b>Females<br/>(N=1,850)<br/>% (95% CI)</b> | <b>Males<br/>(N=1,927)<br/>% (95% CI)</b> |
|-------------------------------------------------|---------------------------------------------|-------------------------------------------|
| Age, median (Q1, Q3)                            | 14.7 (12.9, 16.6)                           | 14.4 (12.6, 16.5)                         |
| <b>Race/Ethnicity</b>                           |                                             |                                           |
| Non-Hispanic White                              | 63.0 (57.1, 68.9)                           | 64.3 (57.5, 71.2)                         |
| Non-Hispanic Black                              | 15.2 (11.2, 19.2)                           | 14.9 (10.8, 19.0)                         |
| Mexican American                                | 11.2 (8, 14.4)                              | 11.4 (8.4, 14.3)                          |
| Other Hispanic                                  | 4.7 (2.5, 7.0)                              | 4.5 (2.7, 6.3)                            |
| Other                                           | 5.8 (3.8, 7.8)                              | 4.9 (2.8, 7.0)                            |
| <b>Federal poverty level ratio distribution</b> |                                             |                                           |
| <1                                              | 19.5 (15.8, 23.3)                           | 18.8 (15.5, 22.0)                         |
| 1–1.9                                           | 21.2 (17.9, 24.5)                           | 19.2 (16.2, 22.3)                         |
| 2–2.9                                           | 17.5 (14.0, 21.0)                           | 18.9 (15.5, 22.4)                         |
| 3–3.9                                           | 15.2 (12.3, 18.2)                           | 15.3 (12.2, 18.5)                         |
| ≥4                                              | 26.6 (21.0, 32.2)                           | 27.7 (23.8, 31.6)                         |
| Missing                                         | 3.8 (2.4, 5.3)                              | 3.2 (1.6, 4.8)                            |
| <b>Insurance type</b>                           |                                             |                                           |
| No insurance                                    | 11.7 (8.9, 14.5)                            | 12.2 (10.0, 14.3)                         |
| Private insurance                               | 70.5 (65.8, 75.1)                           | 67.9 (63.0, 72.7)                         |
| Medicaid                                        | 15.4 (11.5, 19.3)                           | 15.0 (12.0, 18.0)                         |

NHANES, National Health and Nutrition Examination Survey.

**Appendix**  
**The Dose–Response Relationship Between Physical Activity**  
**and Cardiometabolic Health in Adolescents**  
**Sriram et al.**

**Appendix Table 3.** Sample Characteristics of Adolescents (Age 12–19 Years), NHANES 2007–2016

| <b>Characteristics</b>                          | <b>Female<br/>(N=3,108)<br/>% (95% CI)</b> | <b>Male<br/>(N=3,303)<br/>% (95% CI)</b> |
|-------------------------------------------------|--------------------------------------------|------------------------------------------|
| Age, median (Q1, Q3)                            | 14.9 (13.1, 16.7)                          | 14.8 (13, 16.9)                          |
| <b>Race/Ethnicity</b>                           |                                            |                                          |
| Non-Hispanic White                              | 56.4 (52.3, 60.4)                          | 56.4 (52, 60.8)                          |
| Non-Hispanic Black                              | 14.8 (12.3, 17.3)                          | 14.4 (12.0, 16.8)                        |
| Mexican American                                | 13.6 (11.0, 16.2)                          | 14.0 (11.5, 16.5)                        |
| Other Hispanic                                  | 7.2 (5.7, 8.6)                             | 6.8 (5.4, 8.3)                           |
| Other                                           | 8.1 (6.7, 9.4)                             | 8.4 (6.9, 9.9)                           |
| <b>Federal poverty level ratio distribution</b> |                                            |                                          |
| <1                                              | 23.5 (20.9, 26.2)                          | 21.8 (18.9, 24.6)                        |
| 1–1.9                                           | 23.4 (20.8, 26.1)                          | 22.7 (20.3, 25.0)                        |
| 2–2.9                                           | 17.0 (14.5, 19.5)                          | 14.7 (12.9, 16.5)                        |
| 3–3.9                                           | 12.5 (10.3, 14.7)                          | 13.8 (11.5, 16.1)                        |
| ≥4                                              | 23.6 (20.3, 26.9)                          | 27.1 (23.6, 30.5)                        |
| Missing                                         | 7.4 (6.0, 8.8)                             | 7.1 (5.7, 8.5)                           |
| <b>Insurance type</b>                           |                                            |                                          |
| No insurance                                    | 11.7 (9.9, 13.4)                           | 12.1 (10.6, 13.6)                        |
| Private insurance                               | 55.2 (51.7, 58.8)                          | 54.8 (51.4, 58.1)                        |
| Medicaid                                        | 22.6 (20.2, 25.0)                          | 21.1 (18.8, 23.3)                        |

NHANES, National Health and Nutrition Examination Survey.

**Appendix**  
**The Dose–Response Relationship Between Physical Activity**  
**and Cardiometabolic Health in Adolescents**  
**Sriram et al.**

**Appendix Table 4.** Estimated Mean Change of Cardiometabolic Measures for Total Self-Reported Physical Activity (Sum of Recreational, Occupational, and Transport) in Adolescents (Age 12–19 Years), NHANES 2007–2016

| Variable                 | Total self-report (420 vs 0 weekly minutes) <sup>a</sup> |                    |
|--------------------------|----------------------------------------------------------|--------------------|
|                          | Unadjusted (SE)                                          | Adjusted (SE)      |
| Systolic blood pressure  |                                                          |                    |
| Female                   | 0.04 (0.22)                                              | –0.06 (0.23)       |
| Male                     | 0.56 (0.19)                                              | 0.02 (0.20)        |
| Diastolic blood pressure |                                                          |                    |
| Female                   | 0.27 (0.20)                                              | –0.07 (0.20)       |
| Male                     | 0.50 (0.19)                                              | –0.18 (0.18)       |
| Total cholesterol        |                                                          |                    |
| Female                   | –0.50 (0.60)                                             | –0.95 (0.67)       |
| Male                     | 0.25 (0.50)                                              | –0.23 (0.57)       |
| High density lipoprotein |                                                          |                    |
| Female                   | 0.40 (0.23)                                              | 0.41 (0.26)        |
| Male                     | <b>1.32 (0.53)<sup>b</sup></b>                           | <b>1.40 (0.52)</b> |
| BMI                      |                                                          |                    |
| Female                   | <b>–1.14 (0.36)</b>                                      | –0.71 (0.37)       |
| Male                     | –0.23 (0.30)                                             | –0.08 (0.33)       |

*Notes:* Boldface indicates statistical significance ( $p < 0.05$ ). BMI represented as percent of the 95th percentile.

<sup>a</sup>Data from NHANES 2007–2016. Change in cardiometabolic measure at 420 weekly minutes (per adolescent physical activity guideline recommendations) compared to 0 minutes of activity.

<sup>b</sup>Indicates non-linear relationship.

NHANES, National Health and Nutrition Examination Survey.

**Appendix**  
**The Dose–Response Relationship Between Physical Activity**  
**and Cardiometabolic Health in Adolescents**  
**Sriram et al.**

**Appendix Table 5.** Estimated Mean Change of Cardiometabolic Measures for Physical Activity in Adolescents (Sensitivity Analysis for Ages 12–17 Years), NHANES 2003–2016

| Measure                  | Objective (150 vs 0 weekly minutes) <sup>a</sup> |                     | Self-report (420 vs 0 weekly minutes) <sup>b</sup> |                     |
|--------------------------|--------------------------------------------------|---------------------|----------------------------------------------------|---------------------|
|                          | Unadjusted (SE)                                  | Adjusted (SE)       | Unadjusted (SE)                                    | Adjusted (SE)       |
| Systolic blood pressure  |                                                  |                     |                                                    |                     |
| Female                   | <b>–3.12 (1.14)<sup>c</sup></b>                  | –2.84 (1.12)        | 0.25 (0.40)                                        | 0.34 (0.40)         |
| Male                     | <b>–1.56 (0.62)</b>                              | –1.14 (0.64)        | 0.58 (0.29)                                        | 0.48 (0.30)         |
| Diastolic blood pressure |                                                  |                     |                                                    |                     |
| Female                   | <b>–2.81 (0.84)<sup>c</sup></b>                  | <b>–2.59 (0.97)</b> | <b>–1.07 (0.75)<sup>c</sup></b>                    | <b>–1.61 (0.70)</b> |
| Male                     | <b>–1.62 (0.79)</b>                              | –0.92 (0.83)        | –0.27 (0.38)                                       | –0.65 (0.40)        |
| Total cholesterol        |                                                  |                     |                                                    |                     |
| Female                   | –0.23 (3.35)                                     | –0.40 (3.59)        | –1.19 (1.04)                                       | –1.51 (1.10)        |
| Male                     | 0.49 (1.59)                                      | –2.38 (1.85)        | –0.99 (0.95)                                       | –0.67 (1.00)        |
| High density lipoprotein |                                                  |                     |                                                    |                     |
| Female                   | –0.95 (1.56)                                     | –0.64 (1.86)        | <b>1.27 (0.45)</b>                                 | <b>1.27 (0.45)</b>  |
| Male                     | <b>3.85 (1.03)</b>                               | <b>2.42 (1.02)</b>  | <b>1.5 (0.40)</b>                                  | <b>1.69 (0.42)</b>  |
| BMI                      |                                                  |                     |                                                    |                     |
| Female                   | <b>–5.96 (2.36)<sup>c</sup></b>                  | <b>–6.84 (2.40)</b> | –2.09 (0.60)                                       | 1.22 (0.64)         |
| Male                     | <b>–7.63 (2.17)<sup>c</sup></b>                  | <b>–9.07 (2.31)</b> | –0.50 (0.59)                                       | –0.17 (0.62)        |
| VO <sub>2</sub> max      |                                                  |                     |                                                    |                     |
| Female                   | 0.97 (1.11)                                      | 0.13 (1.20)         | N/A <sup>d</sup>                                   | N/A <sup>d</sup>    |
| Male                     | <b>3.12 (1.15)</b>                               | <b>4.73 (1.37)</b>  | N/A <sup>d</sup>                                   | N/A <sup>d</sup>    |

Notes: Boldface indicates statistical significance ( $p < 0.05$ ). BMI represented as percent of the 95th percentile.

<sup>a</sup>Data from NHANES 2003–2006. Change in cardiometabolic measure at 150 weekly minutes (per adult physical activity guideline recommendations) compared to 0 minutes of activity.

<sup>b</sup>Data from NHANES 2007–2016. Change in cardiometabolic measure at 420 weekly minutes (per adolescent physical activity guideline recommendations) compared to 0 minutes of activity.

<sup>c</sup>Indicates non-linear relationship.

<sup>d</sup>Measure not available for survey years used for self-report physical activity data.

NHANES, National Health and Nutrition Examination Survey.

**Appendix**  
**The Dose-Response Relationship Between Physical Activity**  
**and Cardiometabolic Health in Adolescents**  
**Sriram et al.**

**Appendix Figure 1.** Association between self-reported total (recreational, occupational, transportation) physical activity and cardiometabolic measures among adolescents (age 12–19 years), NHANES 2007–2016.

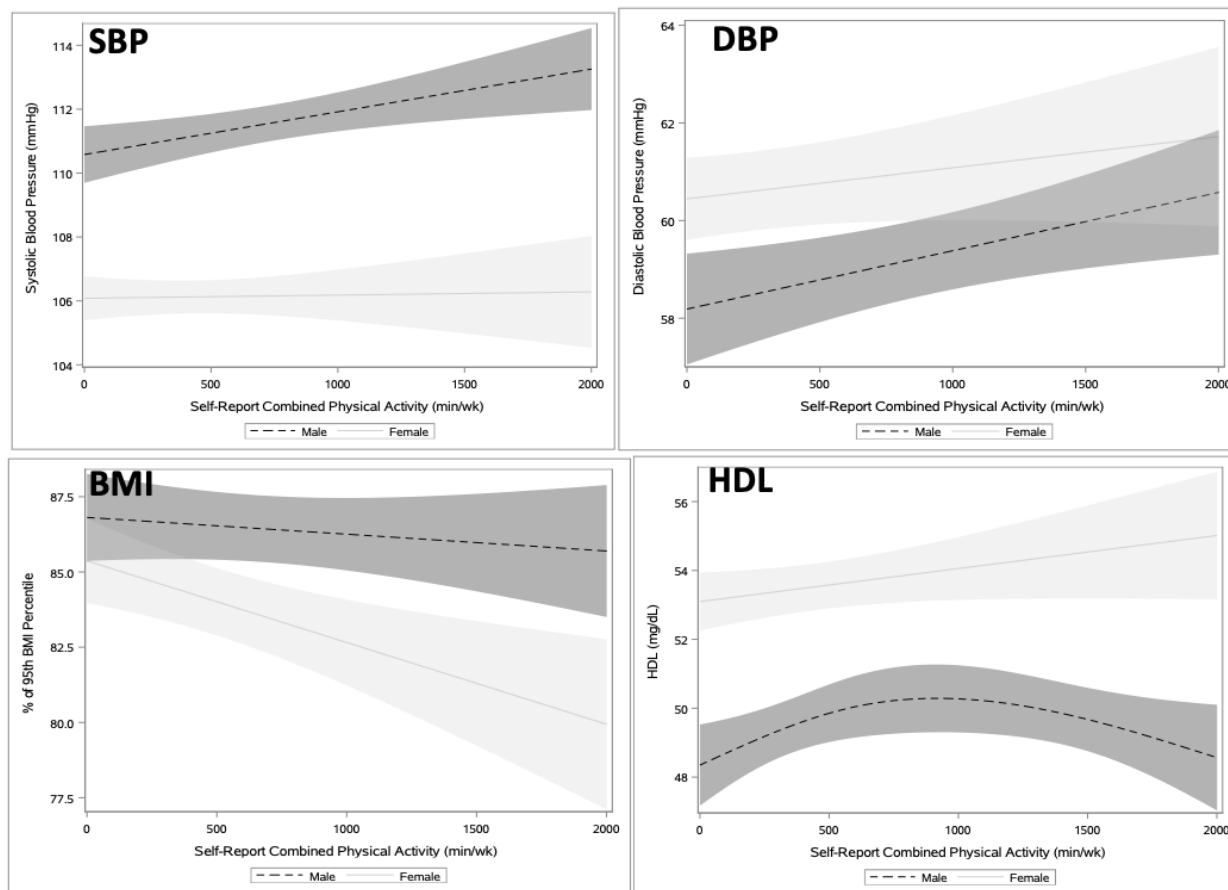

*Notes:* Unadjusted models. Shading represents 95% CI. Self-Reported Total Physical Activity includes recreational, occupational, and transportation physical activity.

SBP, systolic blood pressure; DBP, diastolic blood pressure; HDL, high density lipoprotein; NHANES, National Health and Nutrition Examination Survey.

**Appendix**  
**The Dose-Response Relationship Between Physical Activity**  
**and Cardiometabolic Health in Adolescents**  
**Sriram et al.**

**Appendix Figure 2.** Association between objective physical activity and cardiometabolic measures among adolescents (age 12–17 years), NHANES 2003–2006.

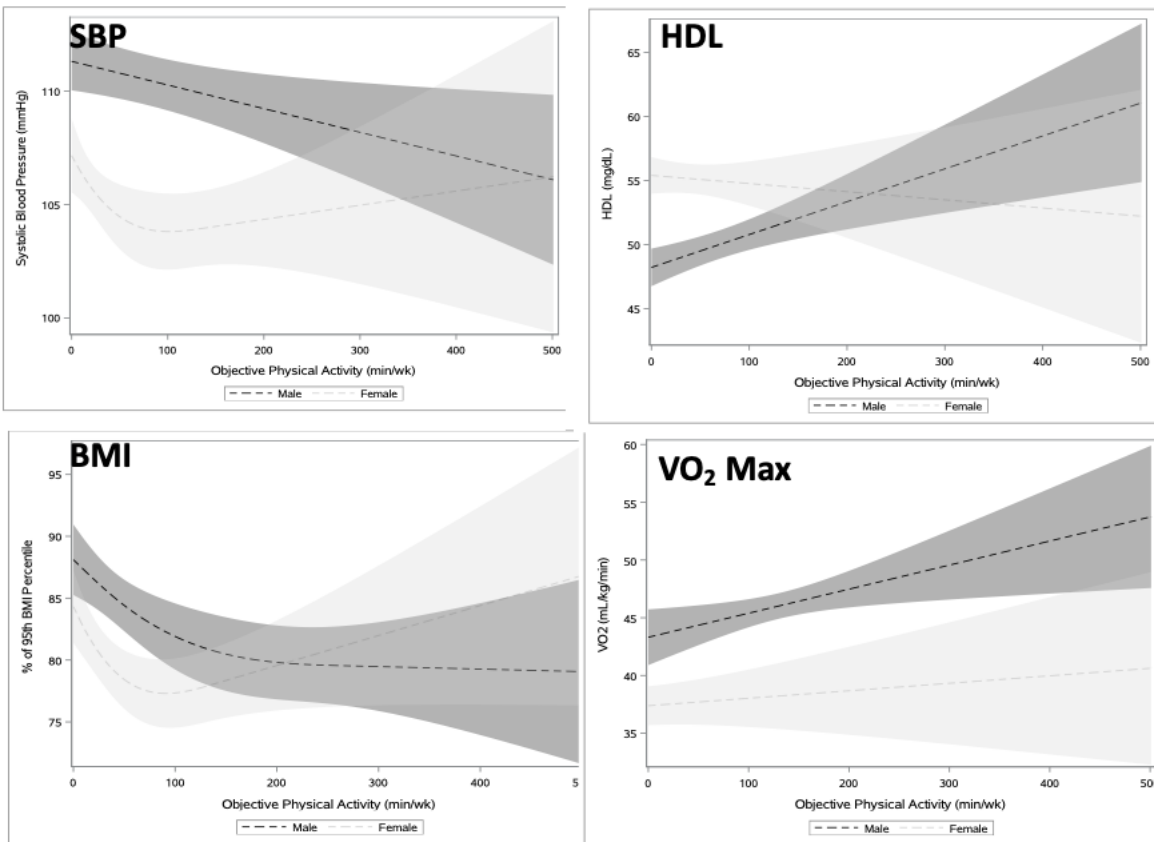

*Notes:* Unadjusted models. Shading represents 95% CI.

SBP, systolic blood pressure; HDL, high density lipoprotein; NHANES, National Health and Nutrition Examination Survey.

**Appendix**  
**The Dose-Response Relationship Between Physical Activity**  
**and Cardiometabolic Health in Adolescents**  
**Sriram et al.**

**Appendix Figure 3.** Association between self-report (recreational) physical activity and cardiometabolic measures among adolescents (age 12–17 years), NHANES 2007–2016.

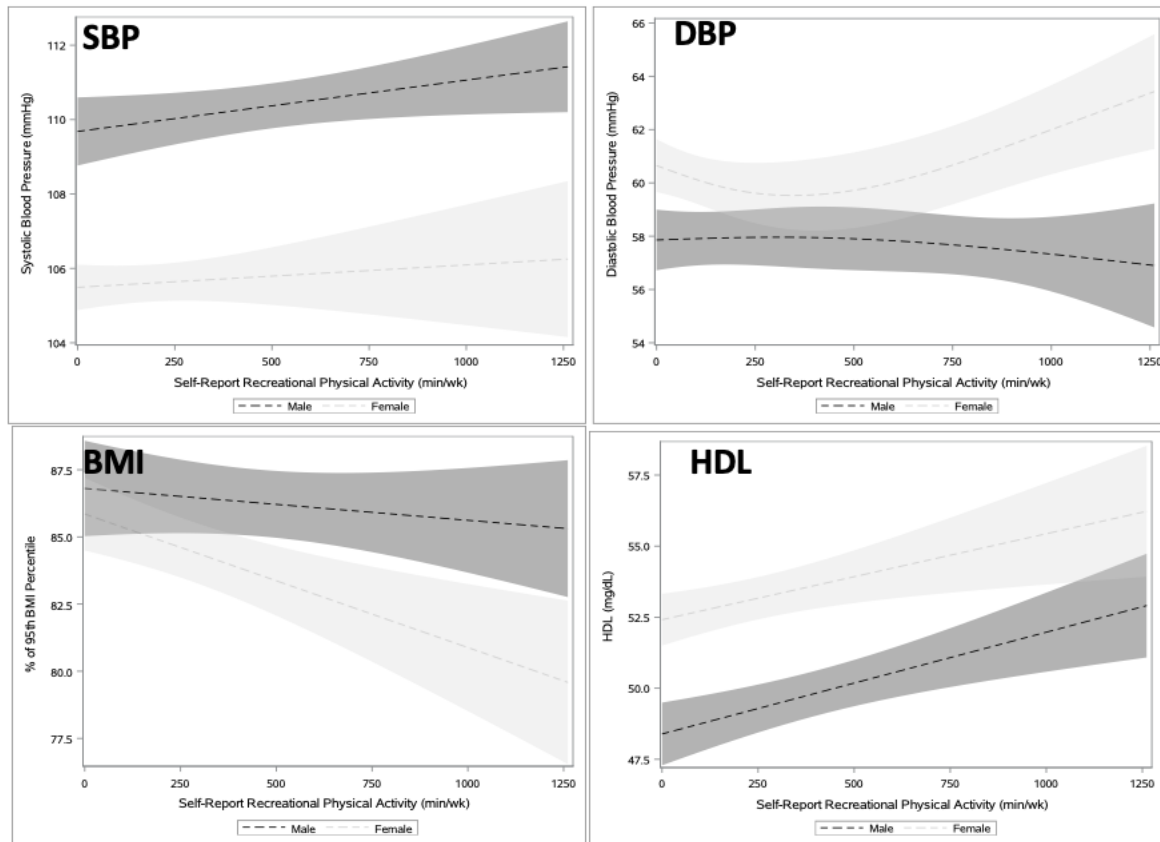

*Notes:* Unadjusted models. Shading represents 95% CI.

SBP, systolic blood pressure; DBP, diastolic blood pressure; HDL, high density lipoprotein; NHANES, National Health and Nutrition Examination Survey.
